# Supplementary material for: The implementation of rare events logistic regression to predict the distribution of mesophotic hard corals across the main Hawaiian Islands
Source: PeerJ. 2016 Jul 6;4:e2189. doi: 10.7717/peerj.2189 (PMC4941748; doi:10.7717/peerj.2189)
Supplement: Table S2 [file peerj-04-2189-s018.docx]

| **Covariate** | **Coefficient estimate** | **Std. error** |
| --- | --- | --- |
| Intercept () | -11.890 | 2.160 |
| Depth () | 0.3617 | 0.06851 |
| Depth*Depth () | -0.004 | 0.0005437 |
| Significant wave height: winter () | -1.303 | 0.1926 |
