# Supplementary material for: The implementation of rare events logistic regression to predict the distribution of mesophotic hard corals across the main Hawaiian Islands
Source: PeerJ. 2016 Jul 6;4:e2189. doi: 10.7717/peerj.2189 (PMC4941748; doi:10.7717/peerj.2189)
Supplement: Table S3 [file peerj-04-2189-s019.docx]

| **Covariate** | **Coefficient estimate** | **Std. error** |
| --- | --- | --- |
| Intercept () | -12.740 | 1.142 |
| Depth () | 0.197 | 0.02572 |
| Depth*Depth () | -0.001 | 0.0001 |
| Mean current velocity: northward, summer () | -2.396 | 0.5666 |
| Mean current velocity: eastward, winter () | -6.591 | 0.8715 |
| Slope () | 0.033 | 0.008185 |
| Rugosity () | 64.560 | 18.230 |
